# Supplementary material for: Morphological, genomic and transcriptomic responses of Klebsiella pneumoniae to the last-line antibiotic colistin
Source: PubMed Central journal article supplement (PMC6026146; doi:10.1038/s41598-018-28199-y), 2018-06-29
Supplement: 41598_2018_28199_MOESM1_ESM.pdf [file 41598_2018_28199_MOESM1_ESM.pdf]

**Morphological, genomic and transcriptomic responses of *Klebsiella pneumoniae* to the last-line antibiotic colistin**

**Authors**

Amy K. Cain, Christine J. Boinett, Lars Barquist, Janina Dordel, Maria Fookes, Matthew Mayho, Matthew J. Ellington, David Goulding, Derek Pickard, Ryan R. Wick, Kathryn E. Holt, Julian Parkhill & Nicholas R. Thomson

**Supplementary Information**

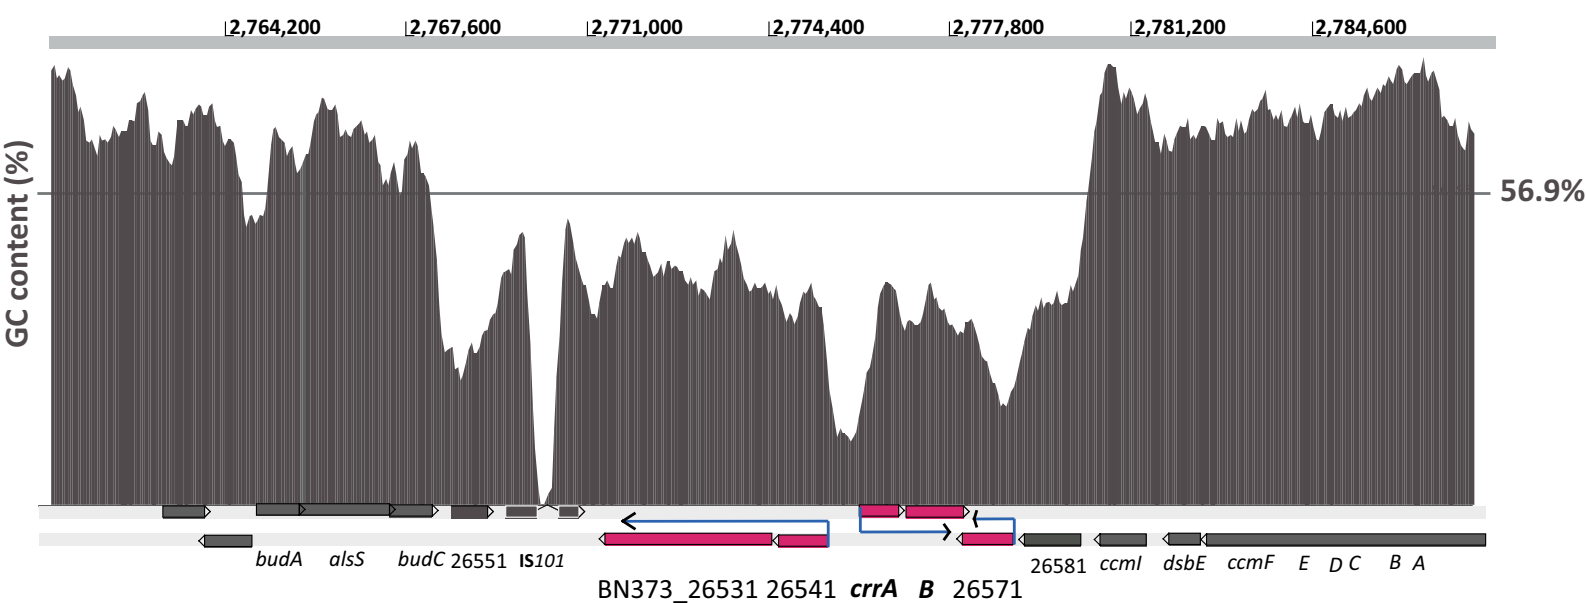

Figure S1. The *crrB* gene and its context within Ecl8. Artemis screen shot with the GC content of each gene shown above, with the horizontal line representing the average GC content of Ecl8. Genes surrounding *crrB* with increased expression during colistin exposure are marked in pink and the transcriptional units of these genes (as predicted using BioCyc: <http://biocyc.org/>) are shown by blue thin arrows.

| Feature                       | Cell morphology                                                                     |                                                                                     | Genes Upregulated                                                                                                                 |
|-------------------------------|-------------------------------------------------------------------------------------|-------------------------------------------------------------------------------------|-----------------------------------------------------------------------------------------------------------------------------------|
|                               | colistin naive                                                                      | D5 colistin exposed                                                                 |                                                                                                                                   |
| A. Fimbriae                   | 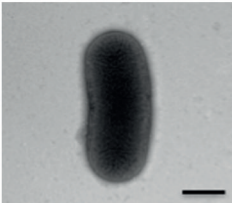   |    | <i>fimACDFG</i><br>(BN373_91191-39231)                                                                                            |
| B. Bacteriophage              |    |    | All P2-like<br>(BN373_1491-921)<br>and lambda<br>(BN373_33401-961)<br>phage genes                                                 |
| C. Loss of Membrane Integrity |   |   | OM proteins<br><i>slyB, yfgL</i><br>lps biosynthesis<br><i>wzzY, wecA, rfaC</i><br>and modification<br><i>arn</i> operons.        |
| D. Exopolysaccharide          |  |  | Not known                                                                                                                         |
| E. Cellular stress            |  |  | <i>dnaJK</i>                                                                                                                      |
| F. Ion storage Granules       |  |  | Ion transport:<br><i>mgtA</i> , and sensor<br>(BN373_misc_RNA00041),<br><i>hemF</i> , FeCT transporter<br>operon (BN373_10811-41) |

Figure S2. TEM and RNAseq comparison of colistin naïve cultures and colR cells under colistin exposure. We imaged 43 and 30 field of view using the capsule stain (A-D) and ultrathin sectioning (E-F) representative of total cells (from D0 control and D5 EM2 + col) and the above images our observations. For B, D, F these were representative of the majority of images observed, and for A, C, E, F these were only seen in the D5 heteroresistant cultures grown with colistin. For each morphological feature, any genes that showed differential expression of D5 + colistin compared to D0 naïve cultures are given on the right. White scale bar shown represents 0.5um and arrows indicate the difference between the colistin exposed and non-exposed cells highlighted for each feature.

**Table S1. Changes in differential expression for known colistin resistance genes in log<sub>2</sub> fold change (log<sub>2</sub>FC) of raw read counts of bulk cultures for each day.**

| Col <sup>R</sup> genes        | Locus ID        | Comparison | Heteroresistant C2       |                          | Comparison  | C2 Mutant                 |
|-------------------------------|-----------------|------------|--------------------------|--------------------------|-------------|---------------------------|
|                               |                 |            | D3<br>+ 32mg/L<br>col    | D5<br>+ 128mg/L<br>col   |             | + 128mg/L<br>col          |
|                               |                 |            | log <sub>2</sub> FC      | log <sub>2</sub> FC      |             | log <sub>2</sub> FC       |
| <b>Regulators</b>             |                 |            |                          |                          |             |                           |
| phoQ                          | BN373_17521     | v no col   | <b>3.30</b>              | 1.78                     | v WT no col | <i>0.11</i> <sup>^</sup>  |
|                               |                 | v D0       | <b>2.68</b>              | 1.57                     | v WT + col  | <i>0.22</i> <sup>^</sup>  |
| phoP                          | BN373_17531     | v no col   | <b>3.52</b>              | <b>2.02</b>              | v WT no col | <i>0.15</i> <sup>^</sup>  |
|                               |                 | v D0       | <b>2.62</b>              | 1.82                     | v WT + col  | <i>-0.32</i>              |
| mgrB                          | BN373_29261     | v no col   | <b>3.16</b>              | 1.37                     | v WT no col | <i>0.086</i> <sup>^</sup> |
|                               |                 | v D0       | <b>2.36</b>              | 1.27                     | v WT + col  | <i>0.92</i> <sup>^</sup>  |
| pmrB                          | BN373_13691     | v no col   | 0.78                     | <b>5.03</b>              | v WT no col | <i>0.59</i> <sup>^</sup>  |
|                               |                 | v D0       | 1.04                     | <b>4.69</b>              | v WT + col  | <b>3.03</b>               |
| pmrA                          | BN373_13701     | v no col   | <i>0.45</i> <sup>^</sup> | <b>4.93</b>              | v WT no col | 0.55                      |
|                               |                 | v D0       | 0.81                     | <b>4.91</b>              | v WT + col  | <b>3.03</b>               |
| pmrC                          | BN373_13711     | v no col   | 0.93                     | <b>5.65</b>              | v WT no col | 0.65                      |
|                               |                 | v D0       | 0.72                     | <b>5.29</b>              | v WT + col  | <b>3.27</b>               |
| pmrD                          | BN373_30261     | v no col   | <b>2.19</b>              | <b>2.00</b>              | v WT no col | <i>0.48</i> <sup>^</sup>  |
|                               |                 | v D0       | <b>2.90</b>              | <b>2.06</b>              | v WT + col  | 0.58                      |
| crrB                          | BN373_26561     | v no col   | 1.56                     | <b>2.64</b>              | v WT no col | <i>0.71</i> <sup>^</sup>  |
|                               |                 | v D0       | <b>3.17</b>              | <b>3.52</b>              | v WT + col  | <b>2.66</b>               |
| crrA                          | BN373_26551     | v no col   | <i>1.43</i> <sup>^</sup> | <i>1.25</i> <sup>^</sup> | v WT no col | <i>0.68</i> <sup>^</sup>  |
|                               |                 | v D0       | <b>2.96</b>              | <b>2.55</b>              | v WT + col  | <b>2.58</b>               |
| <b>Lipid A modification</b>   |                 |            |                          |                          |             |                           |
| arnA-T (range)                | arnA-T (range)  | v no col   | <b>6.47 to 4.54</b>      | <b>2.69 to 2.54</b>      | v WT no col | 0.16 to 1.42              |
|                               | BN373_44781-821 | v D0       | <b>5.60 to 4.53</b>      | <b>6.53 to 5.17</b>      | v WT + col  | <b>2.39 to 3.46</b>       |
| pagP                          | BN373_12351     | v no col   | <b>3.49</b>              | 1.65                     | v WT no col | 0.56                      |
|                               |                 | v D0       | <b>2.96</b>              | <b>2.55</b>              | v WT + col  | <b>3.16</b>               |
| <b>Efflux</b>                 |                 |            |                          |                          |             |                           |
| RND-family                    | BN373_11321     | v no col   | <b>2.46</b>              | <b>2.02</b>              | v WT no col | <i>0.002</i> <sup>^</sup> |
|                               |                 | v D0       | <b>3.76</b>              | <b>2.42</b>              | v WT + col  | <b>-1.21</b>              |
| macA                          | BN373_15271     | v no col   | <b>2.91</b>              | 1.60                     | v WT no col | -0.18                     |
|                               |                 | v D0       | <b>2.29</b>              | 1.62                     | v WT + col  | 0.11                      |
| oqxA                          | BN373_36071     | v no col   | <i>0.09</i> <sup>^</sup> | <b>2.32</b>              | v WT no col | -0.35                     |
|                               |                 | v D0       | <i>1.11</i> <sup>^</sup> | <b>3.43</b>              | v WT + col  | -0.43                     |
| <b>crrB-containing region</b> |                 |            |                          |                          |             |                           |
| acridine pump                 | BN373_26531     | v no col   | <i>0.83</i> <sup>^</sup> | <b>6.09</b>              | v WT no col | 1.45                      |
|                               |                 | v D0       | <i>0.98</i> <sup>^</sup> | <b>6.37</b>              | v WT + col  | <b>4.67</b>               |
| crrC                          | BN373_26541     | v no col   | <i>1.56</i> <sup>^</sup> | <b>8.67</b>              | v WT no col | 4.32                      |
|                               |                 | v D0       | <b>2.82</b>              | <b>9.12</b>              | v WT + col  | <b>8.02</b>               |
| glycosyltransferase           | BN373_26571     | v no col   | <b>1.97</b>              | <b>7.45</b>              | v WT no col | 1.65                      |
|                               |                 | v D0       | <b>3.95</b>              | <b>8.09</b>              | v WT + col  | <b>7.42</b>               |

<sup>^</sup> = not statistically significant (adjusted P-value >0.05)

Italic font denotes results not statistically significant (adjusted P-value of >0.05); bold denotes a significant expression change (log<sub>2</sub>fold Change >2); blue denotes cells with both; light blue is changes above log<sub>2</sub>FC of 1 ie a fold change of at least 2

**Table S2.** List of European Nucleotide Archive database accession numbers for all nucleotide sequence data used in this study.

| Culture              | Time Point | Replicate | WGS             |                  | RNAseq          |                             |
|----------------------|------------|-----------|-----------------|------------------|-----------------|-----------------------------|
|                      |            |           | Sequencing name | Sample accession | Sequencing name | Run accession (lane1/lane2) |
| C1                   | D0         | 1         | EM1D0           | ERR564134        | -               | -                           |
|                      |            | 2         | EM1D0           | ERR303228        | -               | -                           |
|                      | D3         | 1         | EM1D3_COL       | ERR564140        | -               | -                           |
|                      |            | 2         | EM1D3           | ERR303231        | -               | -                           |
|                      | D5         | 1         | EM1D5_COL       | ERR564158        | -               | -                           |
|                      |            | 2         | EM1D5           | ERR303233        | -               | -                           |
|                      | D10        | 1         | EM1D10_CAAB     | ERR564176        | -               | -                           |
|                      | C2         | D0        | 1               | E-M2D0           | ERR564135       | EM21D0                      |
| 2                    |            |           | EM2D0           | ERR303237        | EM22D0          | ERR576125/ERR576141         |
| D3                   |            | 1         | E-M2D3_COL      | ERR564141        | EM21D3col       | ERR576159/ERR576175         |
|                      |            | 2         | EM2D3           | ERR303238        | EM22D3col       | ERR576127/ERR576143         |
| D5                   |            | 1         | E-M2D5_COL      | ERR564159        | EM21D5col       | ERR576161/ERR576177         |
|                      |            | 2         | EM2D5           | ERR303239        | EM22D5col       | ERR576129/ERR576145         |
| D8                   |            | 1         | D8_EM2_1        | ERR777762        | -               | -                           |
|                      |            | 2         | D8_EM2_2        | ERR777763        | -               | -                           |
| C2 Single SNP mutant | D5         | -         | SNP_col9_LB     | ERR757678        |                 |                             |

**Table S3. List of primers for QPCR and Sanger sequencing used in this study.**

| <b>Location</b>     | <b>Primer name</b> | <b>Sequence 5'-&gt;3'</b> | <b>Reference</b> |
|---------------------|--------------------|---------------------------|------------------|
| <b>QPCR primers</b> |                    |                           |                  |
| BN373_r00191        | Kp_16SQ_F          | GTTACCCGCAGAAGAAGCAC      | 70               |
|                     | Kp_16SQ_R          | CTACGCATTTACCGCTACA       | 70               |
| BN373_10601         | lpxL-2_QF          | TTTTCTGACCCTCGAAATGG      | 70               |
|                     | lpxL-2_QR          | GGTCTTGTTAGAGCGCAAGC      | 70               |
| BN373_15721         | OmpFF              | AAAACGGCAACAAACTGGAC      | 70               |
|                     | OmpFR              | AGACGGGTTTTTGTGGTCTG      | 70               |
| BN373_06861         | lpxA_QF            | GGCAACGATAACCTGCTGAT      | 70               |
|                     | lpxA_QR            | CCATAACGTGTGAGCCAATG      | 70               |
| BN373_09691         | lpxH_QF            | CGATGACCAAGGCTATCTGG      | 70               |
|                     | lpxH_QR            | GTCAACTACCGCCTGTGGAT      | 70               |
| BN373_45461         | OmpAF              | AAACATGACCGCGGCAAAGG      | This study       |
|                     | OmpAR              | CCCCGGTTCCTGCATTTTG       | This study       |
| BN373_47461         | gyrB-F             | TTCCTGAACTCCGGCGTCTC      | This study       |
|                     | gyrB-R             | CGCTGCGGAATGTTGTTGGT      | This study       |
| <b>PCR primers</b>  |                    |                           |                  |
| <b><i>crrB</i></b>  | Kp_crrB_1_Fw       | GTGAATTAACACGCGCATT       | This study       |
|                     | Kp_crrB_6_Rv       | AGTTACAGACGCTGGATGC       | This study       |
